# Supplementary material for: Manipulation of time-dependent multicolour evolution of X-ray excited afterglow in lanthanide-doped fluoride nanoparticles
Source: PubMed Central journal article supplement (PMC9525643; doi:10.1038/s41467-022-33489-1), 2022-09-30
Supplement: 41467_2022_33489_MOESM1_ESM.pdf [file 41467_2022_33489_MOESM1_ESM.pdf]

## Supplementary Information

Manipulation of time-dependent multicolor evolution of X-ray excited afterglow in lanthanide-doped fluoride nanoparticles

Lei Lei<sup>1</sup>, Yubin Wang<sup>1</sup>, Weixin Xu<sup>1</sup>, Renguang Ye<sup>1</sup>, Youjie Hua<sup>1</sup>, Degang Deng<sup>1</sup>, Liang Chen<sup>1</sup>, Paras N. Prasad<sup>2</sup>, Shiqing Xu<sup>1</sup>

<sup>1</sup>Key Laboratory of Rare Earth Optoelectronic Materials and Devices of Zhejiang Province, Institute of Optoelectronic Materials and Devices, China Jiliang University, Hangzhou 310018, People's Republic of China

<sup>2</sup> Institute for Lasers, Photonics, and Biophotonics and Department of Chemistry, University at Buffalo, State University of New York, Buffalo, New York 14260, United States

Correspondence and requests for materials should be addressed to P.N. (email: pnprasad@buffalo.edu) or to X.S. (email: shiqingxu@cjlu.edu.cn)

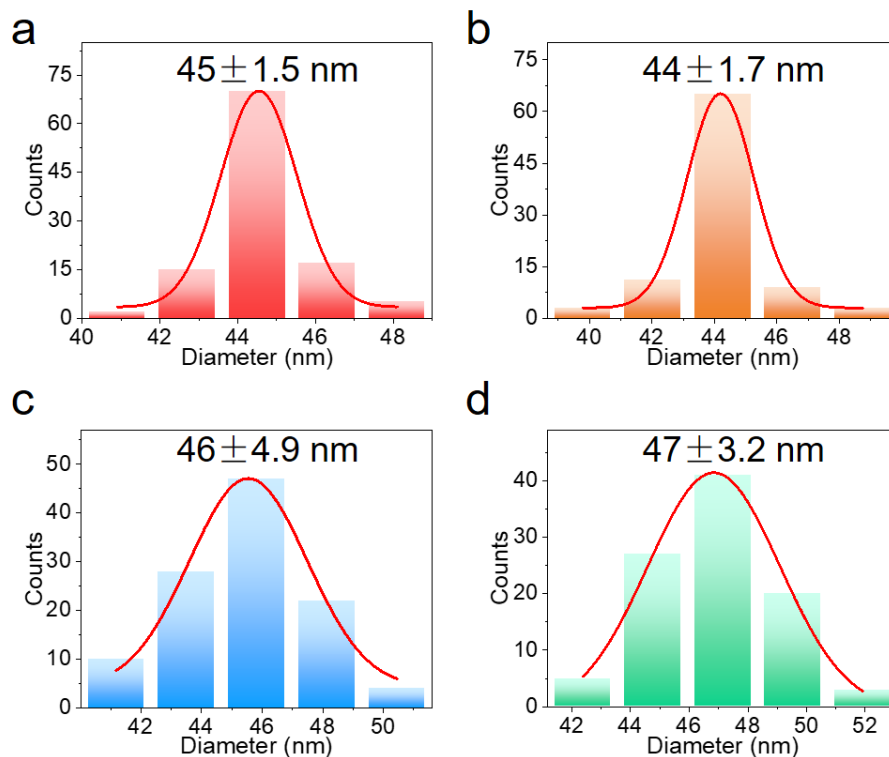

**Supplementary Fig. 1** Histograms of size distributions of the NaLuF<sub>4</sub>: Gd/Tb NPs prepared with different [Na]/[RE], 2.5 (a), 5 (b), 7.5 (c) and 10 (d). Source data are provided as a Source Data file.

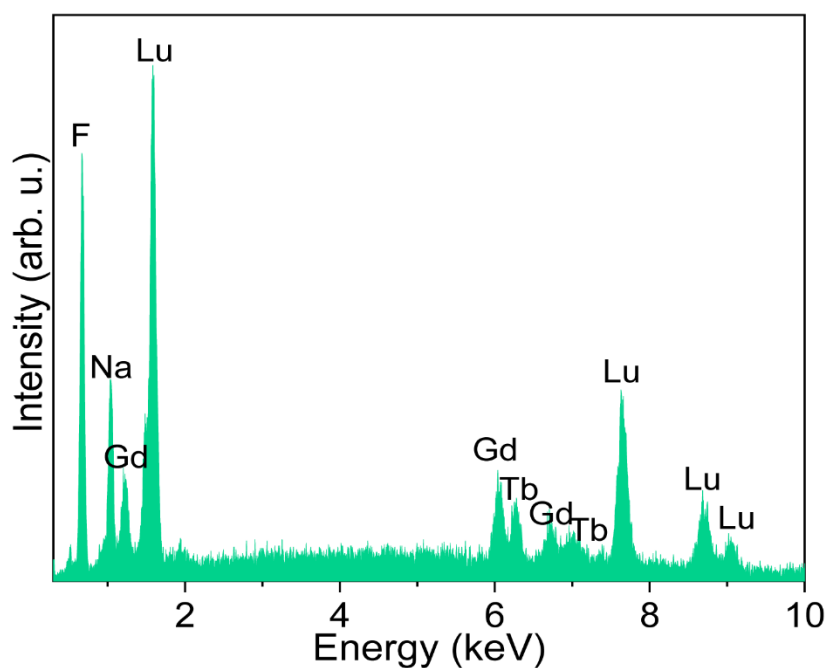

**Supplementary Fig. 2** EDS spectrum of the NaLuF<sub>4</sub>: Gd/Tb NPs prepared with [Na]/[RE] of 10. Source data are provided as a Source Data file.

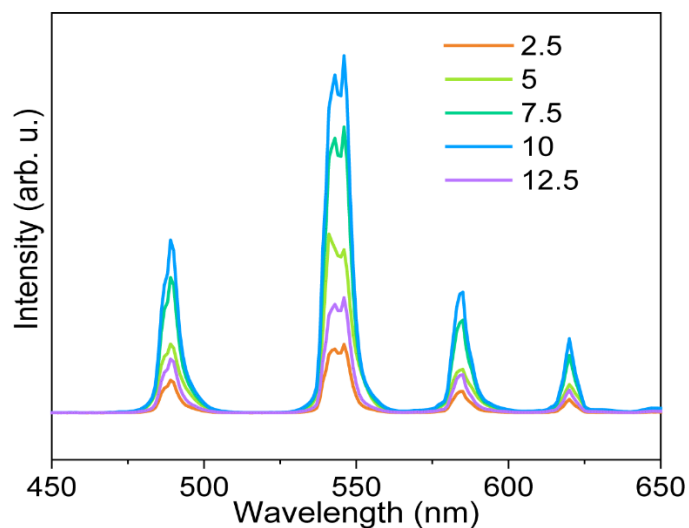

**Supplementary Fig. 3** X-ray excited prompt luminescence (XEOL) of the NaLuF<sub>4</sub>:Gd/Tb NPs prepared with different [Na]/[RE] (2.5, 5, 7.5 and 10, 12.5). Source data are provided as a Source Data file.

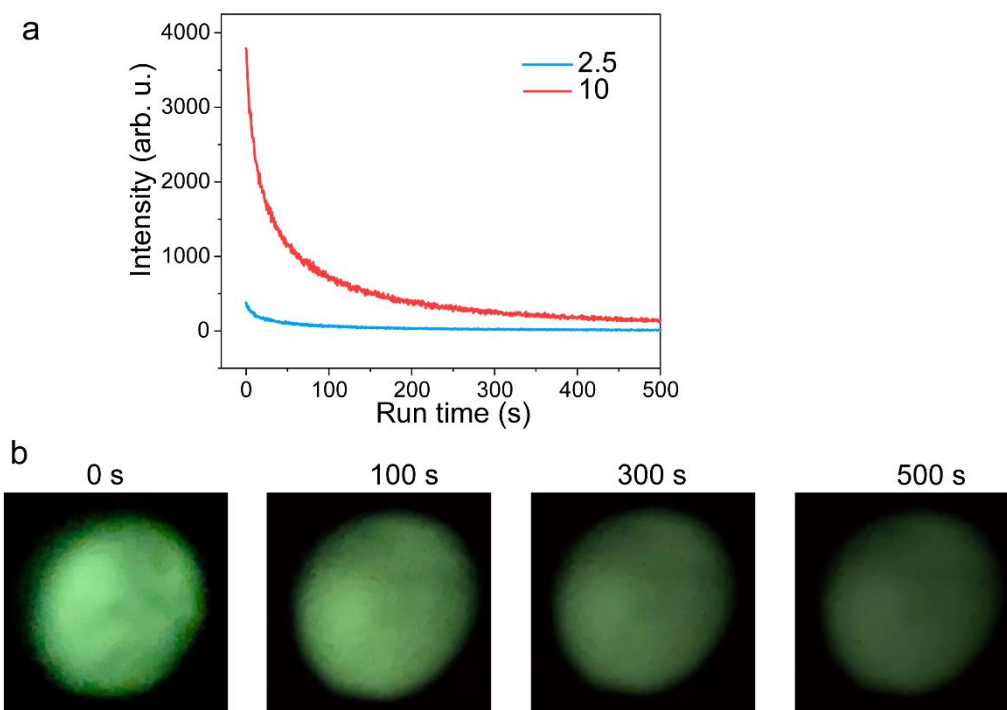

**Supplementary Fig. 4 a** XEA decay curves of the NaLuF<sub>4</sub>: 15Gd/ 15Tb NPs prepared with [Na]/[RE] of 2.5 and 10. **b** Photographs of the NaLuF<sub>4</sub>: 15Gd/ 15Tb NPs prepared with [Na]/[RE] of 10 at different time after the caseation of X-rays (30 kV for 5 min). Source data are provided as a Source Data file.

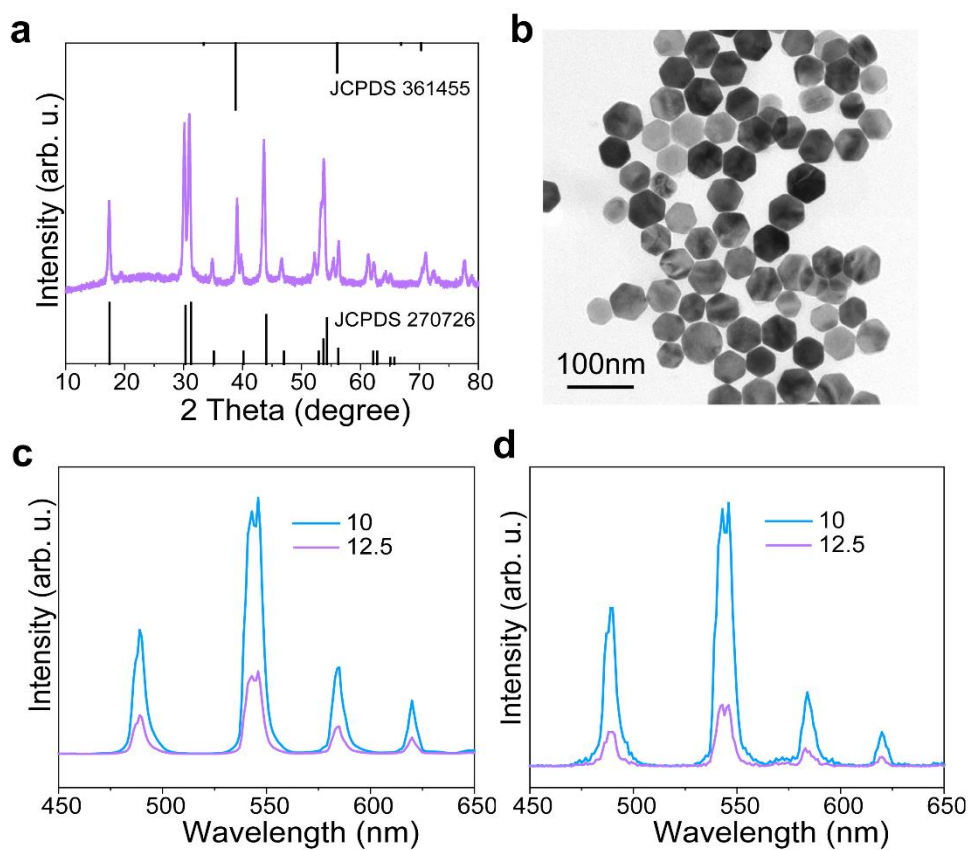

**Supplementary Fig. 5** XRD pattern (a), TEM image (b) of the NaLuF<sub>4</sub>: Gd/Tb NPs prepared with [Na]/[RE] of 12.5. XEOL (c) and XEA (d) of the NaLuF<sub>4</sub>: Gd/Tb NPs prepared with [Na]/[RE] of 10 and 12.5. The JCPDS 361455 and 270726 represent the standard data of cubic NaF and hexagonal NaLuF<sub>4</sub>. Source data are provided as a Source Data file.

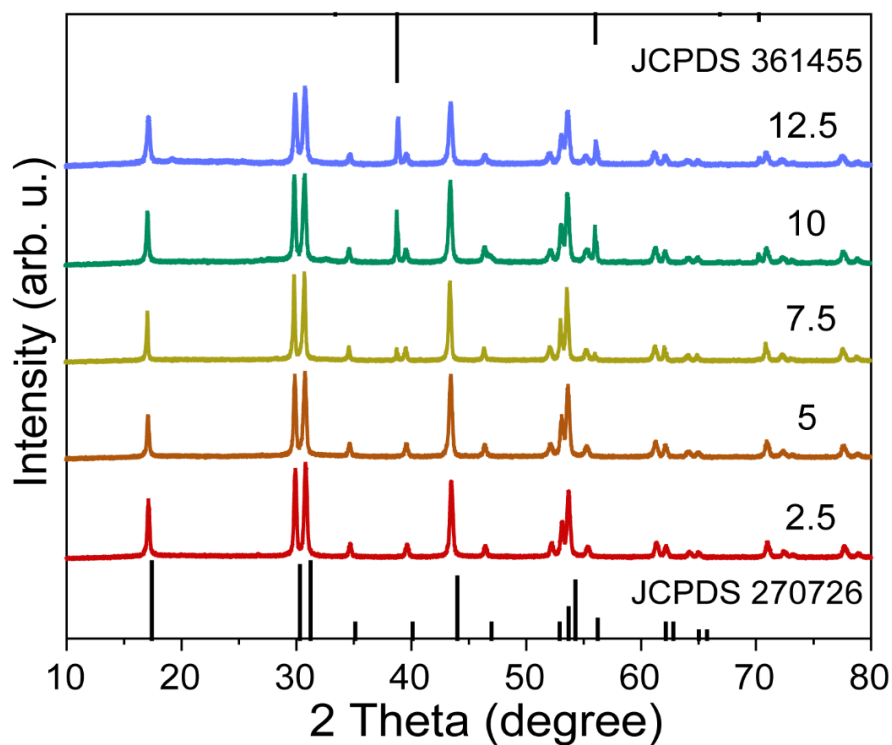

**Supplementary Fig. 6** XRD patterns of the NaLuF<sub>4</sub>: Gd/Tb NPs prepared with different [Na]/[RE] (2.5, 5, 7.5, 10 and 12.5) and [F]/[RE] of 5. Source data are provided as a Source Data file.

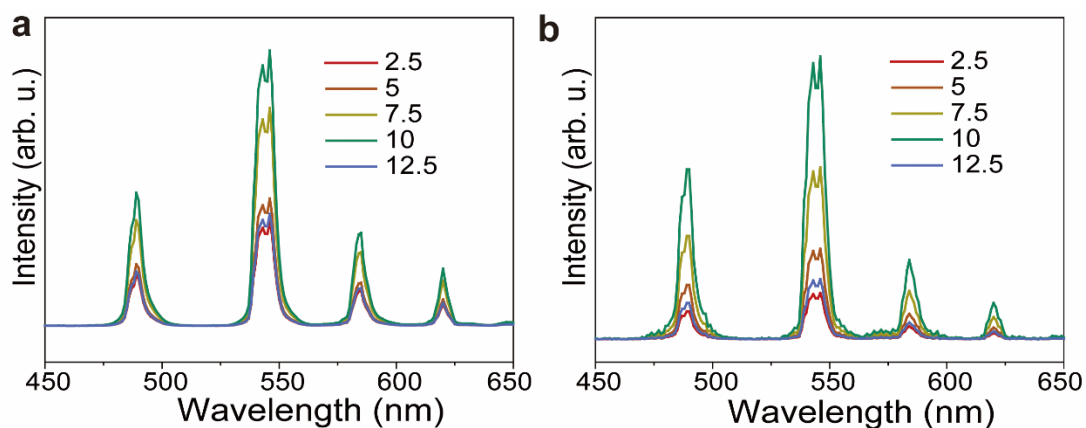

**Supplementary Fig. 7** XEOL (a) and XEA (b) spectra of the NaLuF<sub>4</sub>: Gd/Tb NPs prepared with different [Na]/[RE] (2.5, 5, 7.5, 10 and 12.5) and [F]/[RE] of 5. Source data are provided as a Source Data file.

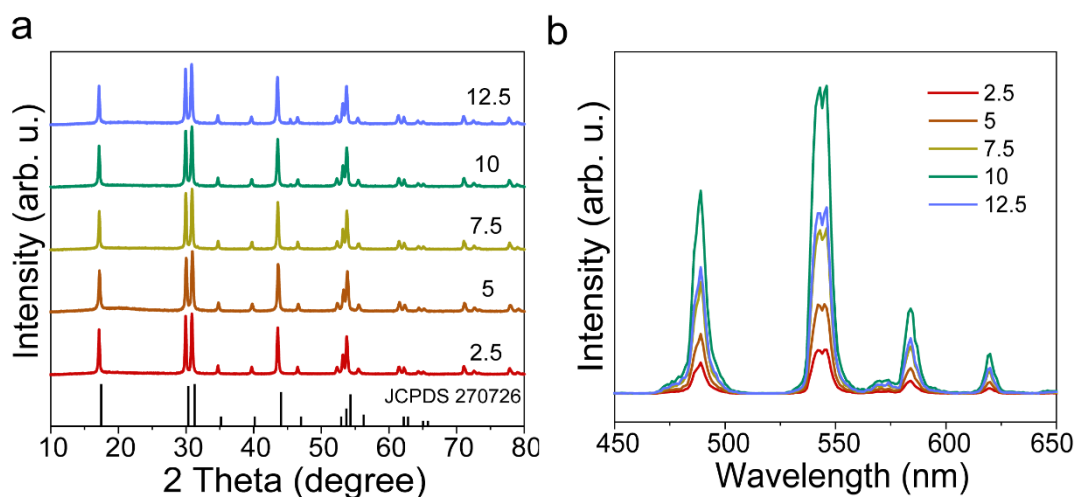

**Supplementary Fig. 8** XRD patterns (a) and XEA spectra (b) of the NaLuF<sub>4</sub>: Gd/Tb NPs ([Na]/[RE] = (2.5, 5, 7.5, 10, 12.5 and [F]/[RE] = 5) after washing with water-ethanol mixture. Source data are provided as a Source Data file.

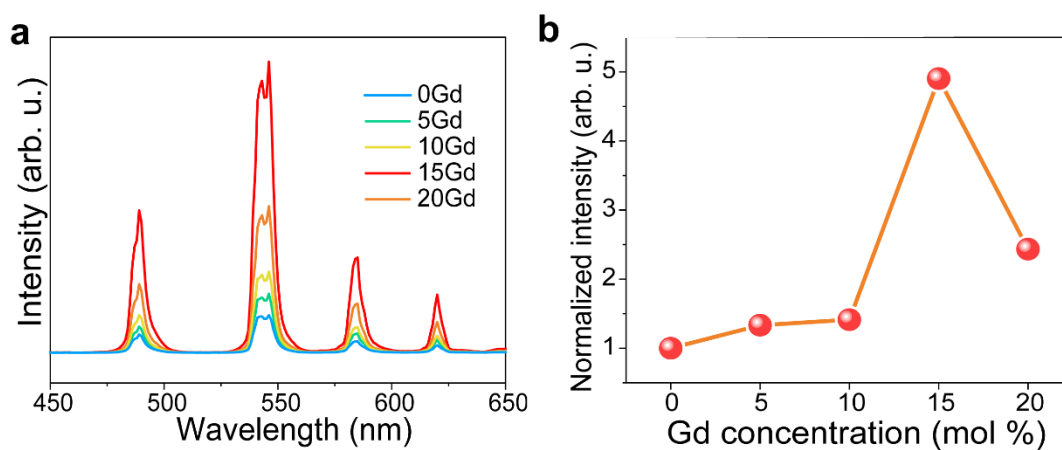

**Supplementary Fig. 9** XEOL (a) and the corresponding normalized integral intensity variations (b) of the NaLuF<sub>4</sub>: Gd/Tb NPs with different Gd<sup>3+</sup> doping concentrations (0, 5, 10, 15, and 20 mol%). The case of 0 mol% is normalized to 1. Source data are provided as a Source Data file.

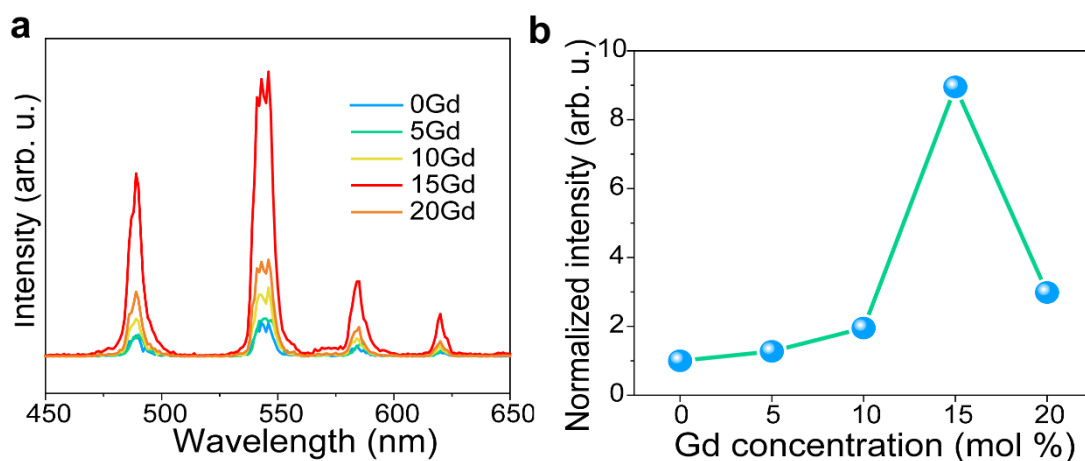

**Supplementary Fig. 10** XEA (a) and the corresponding normalized integral intensity variations (b) of the NaLuF<sub>4</sub>: Gd/Tb NPs with different Gd<sup>3+</sup> doping concentrations (0, 5, 10, 15, and 20 mol%). The case of 0 mol% is normalized to 1. Source data are provided as a Source Data file.

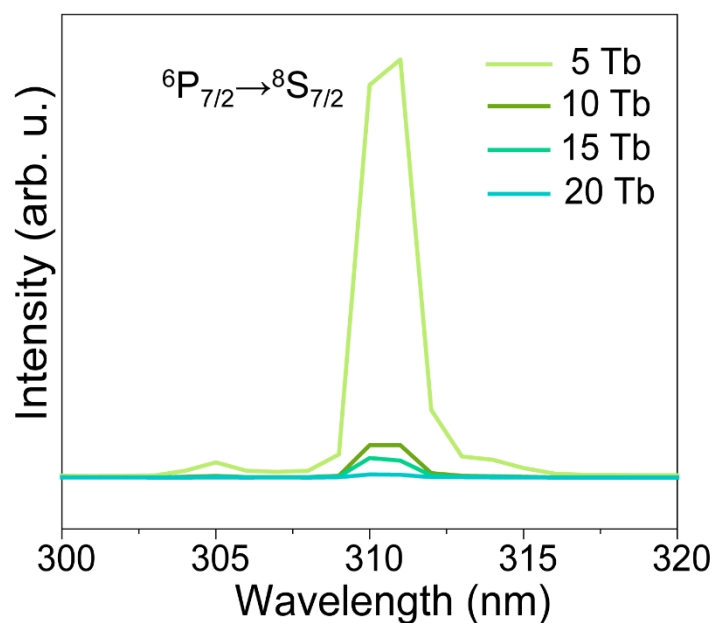

**Supplementary Fig. 11** XEOL spectra of the NaLuF<sub>4</sub>: 15Gd/Tb NPs with different Tb<sup>3+</sup> doping concentrations (5, 10, 15, and 20 mol%). Source data are provided as a Source Data file.

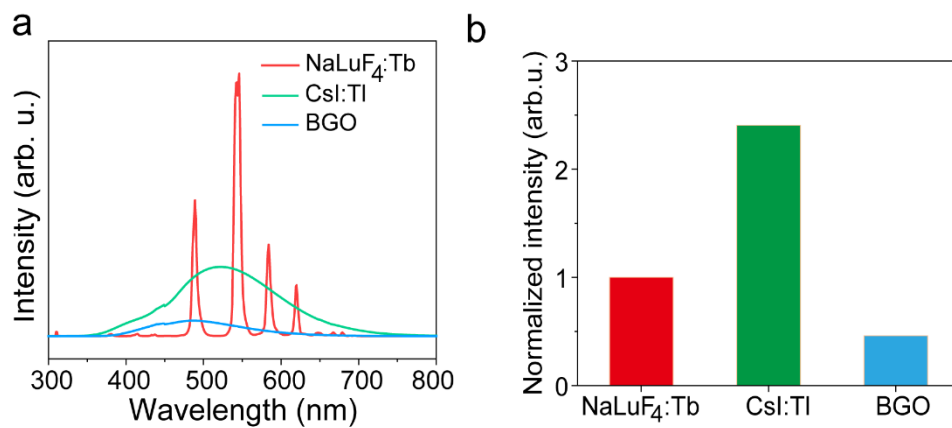

**Supplementary Fig. 12** Compared XEOL spectra (a) and the corresponding normalized integral intensities (b) of the NaLuF<sub>4</sub>:Tb NPs, commercial CsI:Tl and BGO scintillators. Source data are provided as a Source Data file.



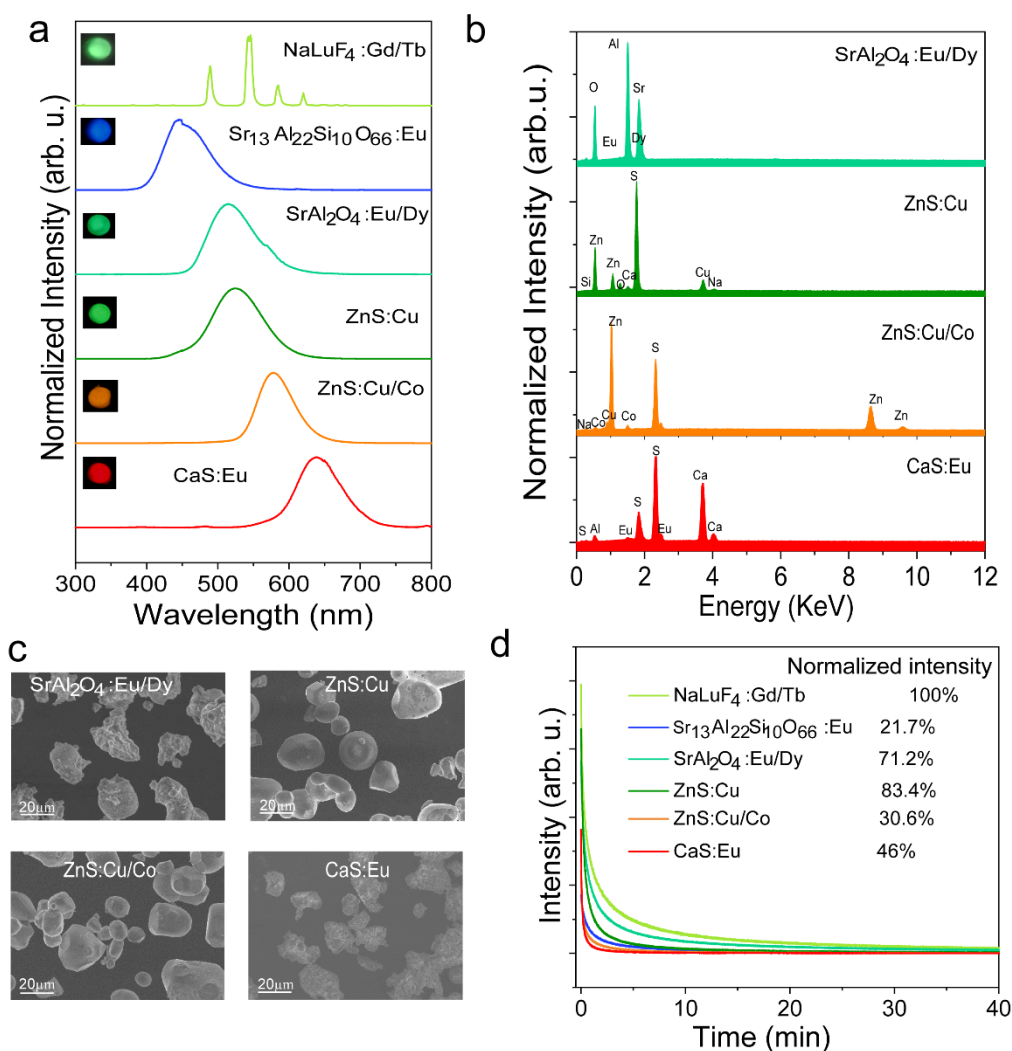

**Supplementary Fig. 13 a** Normalized XEOL spectra of the NaLuF<sub>4</sub>: Tb NPs and various of conventional persistent phosphors. EDS spectrum (**b**) and SEM images (**c**) of different persistent phosphors. **d** XEA decay curves of those compared persistent phosphors. Inset shows their corresponding normalized initial XEA intensities. Source data are provided as a Source Data file.

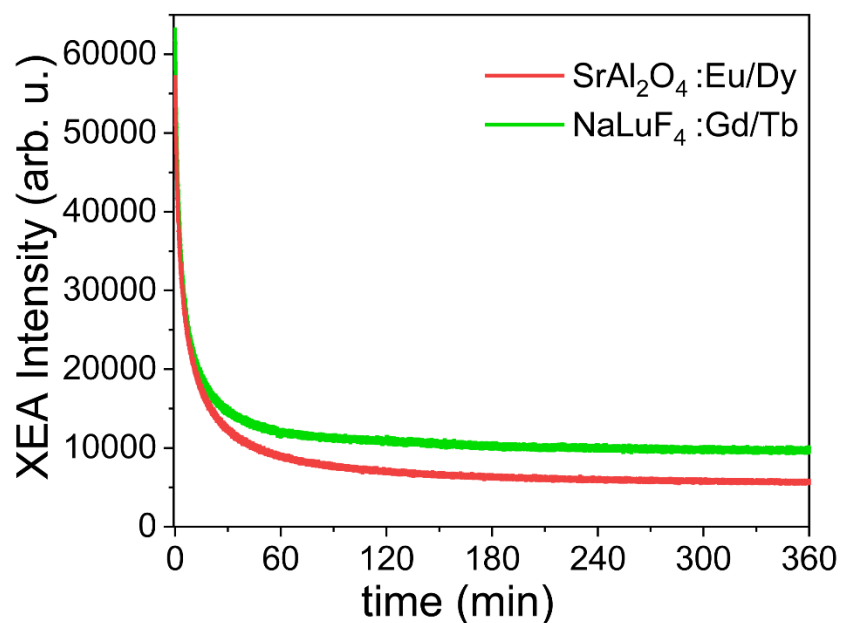

**Supplementary Fig. 14** Compared XEA decay curves of the NaLuF<sub>4</sub>: 15Gd/15Tb NPs and commercial SrAl<sub>2</sub>O<sub>4</sub>:Eu/Dy persistent phosphor (Edinburgh Instrument: FLS980 with R928 detector). Source data are provided as a Source Data file.

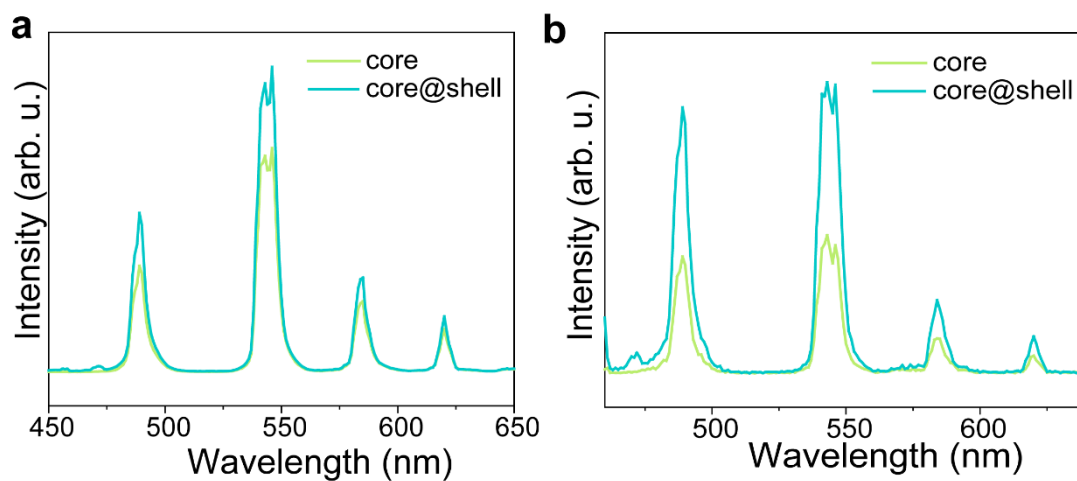

**Supplementary Fig. 15** XEOL (a) and XEA (b) spectra of the NaLuF<sub>4</sub>: Gd/Tb (15/15 mol%) core and NaLuF<sub>4</sub>: Gd/Tb@NaYF<sub>4</sub> core@shell NPs. Source data are provided as a Source Data file.

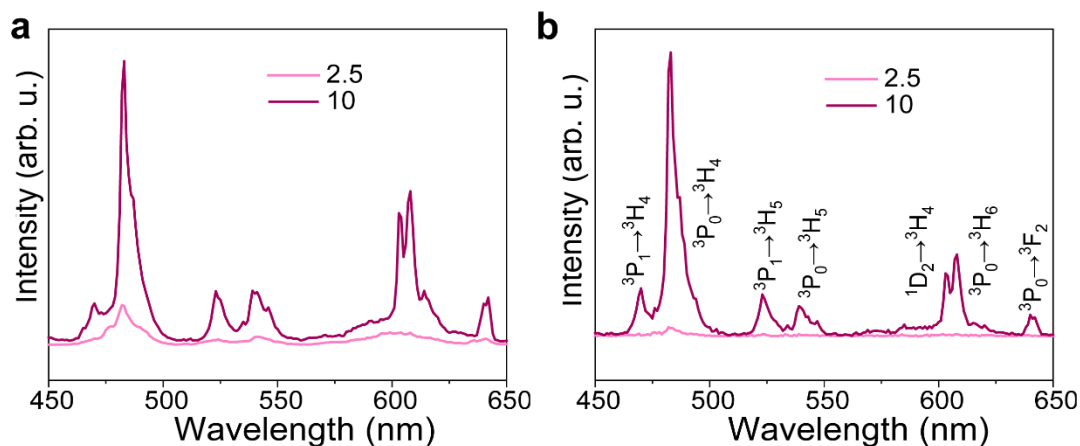

**Supplementary Fig. 16** XEOL (a) and XEA (b) spectra of the NaLuF<sub>4</sub>: Gd/Pr NPs prepared with [Na]/[RE] of 2.5 and 10. Source data are provided as a Source Data file.

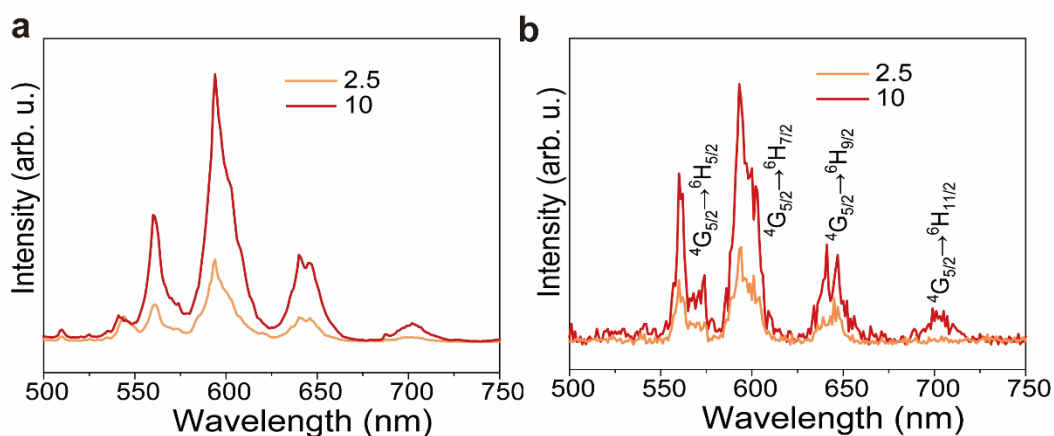

**Supplementary Fig. 17** XEOL (a) and XEA (b) spectra of the NaLuF<sub>4</sub>: Gd/Sm NPs prepared with [Na]/[RE] of 2.5 and 10. Source data are provided as a Source Data file.

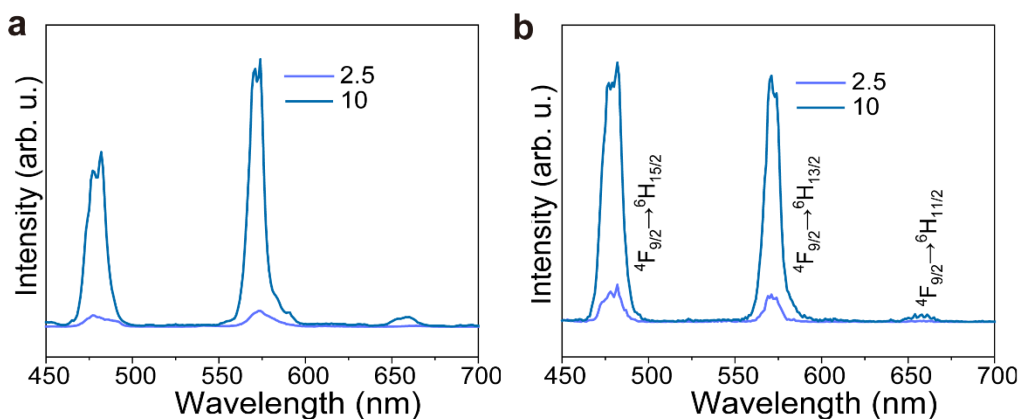

**Supplementary Fig. 18** XEOL (a) and XEA (b) spectra of the NaLuF<sub>4</sub>: Gd/Dy NPs prepared with [Na]/[RE] of 2.5 and 10. Source data are provided as a Source Data file.

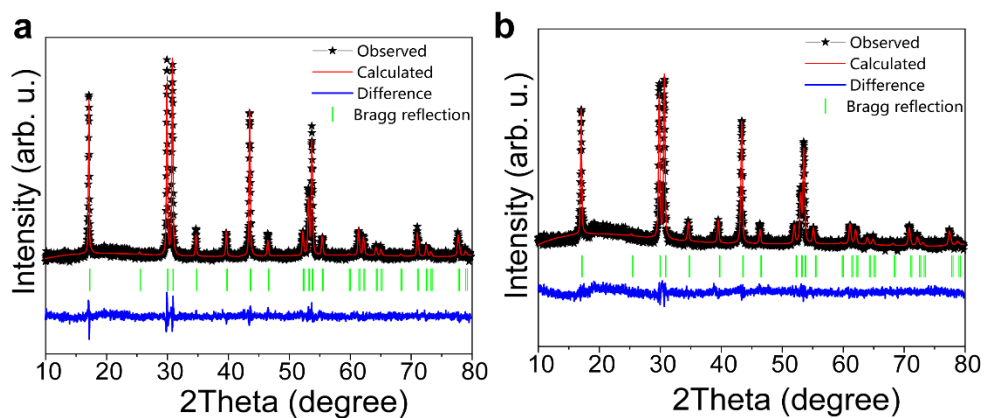

**Supplementary Fig. 19** Rietveld refinement XRD patterns of the NaLuF<sub>4</sub>: Gd/Tb NPs prepared with [Na]/[RE] of 2.5 (a) and 10 (b). Source data are provided as a Source Data file.

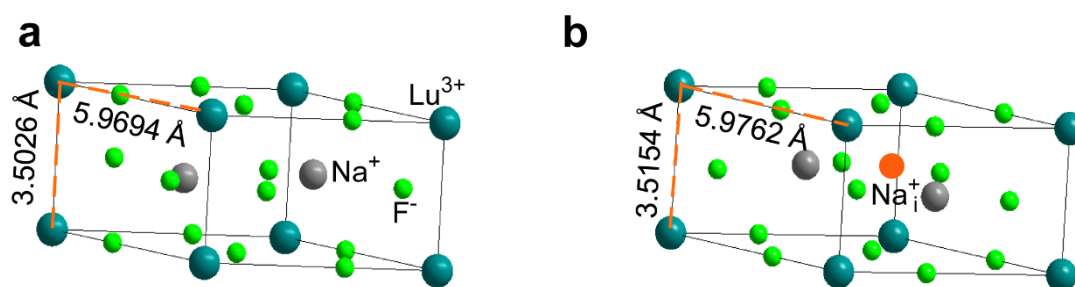

**Supplementary Fig. 20** Schematic illustration of the hexagonal NaLuF<sub>4</sub> crystal structure with (a) and without (b) interstitial Na<sup>+</sup> ( $Na_i^+$ ).

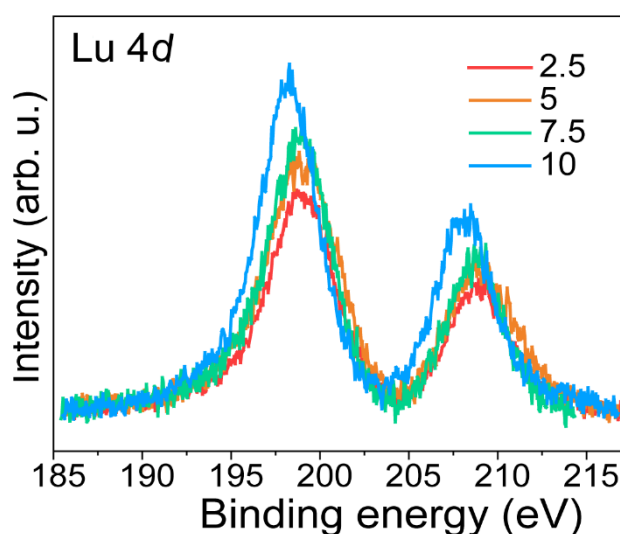

**Supplementary Fig. 21** XPS spectra of Lu 4d for the NaLuF<sub>4</sub>: Gd/Tb NPs prepared with different [Na]/[RE]. Source data are provided as a Source Data file.

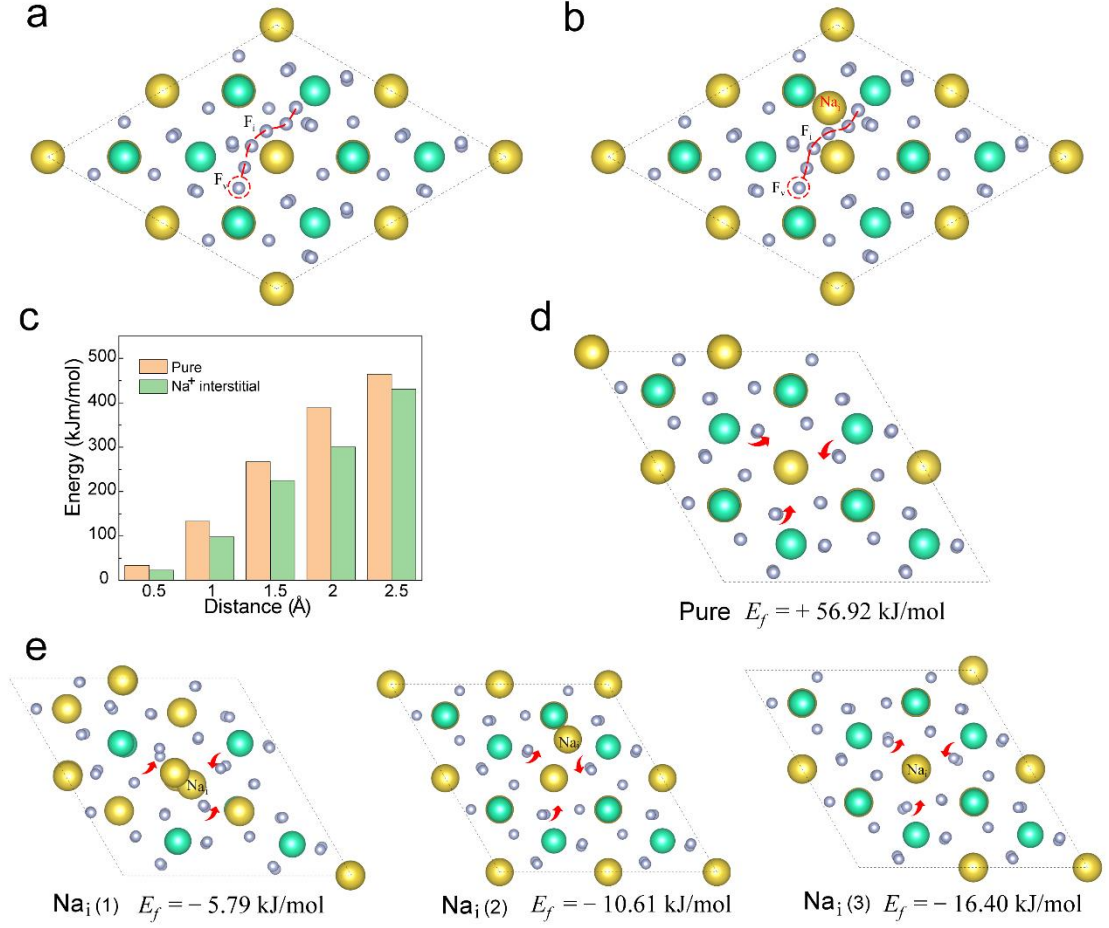

**Supplementary Fig. 22** Schematic illustration of the Frenkel defects with different distances in the NaLuF<sub>4</sub> structure without (a) and with (b) interstitial Na<sup>+</sup> ions. c The corresponding calculated Frenkel defect formation energies. Formation of Frenkel defects in the NaLuF<sub>4</sub> structures without (d) and with (e) interstitial Na<sup>+</sup> ions at different sites under the consideration of the relaxation of all atoms. Source data are provided as a Source Data file.

**Supplementary Discussion.** The amount of X-ray induced Frenkel defects ( $n_F$ ) can be expressed by the following equation<sup>5</sup>:

$$n_F = \sqrt{N_I N_i} e^{-\frac{E_f}{2kT}} \quad (1)$$

where  $N_l$  and  $N_i$  are the number of F<sup>-</sup> lattices and interstitial sites, respectively,  $k$  and  $T$  are Boltzmann constant and temperature, respectively. In this occasion, the decrease of  $E_f$  can lead to an evident increase of  $n_F$ , which benefits the formation of high concentration traps.

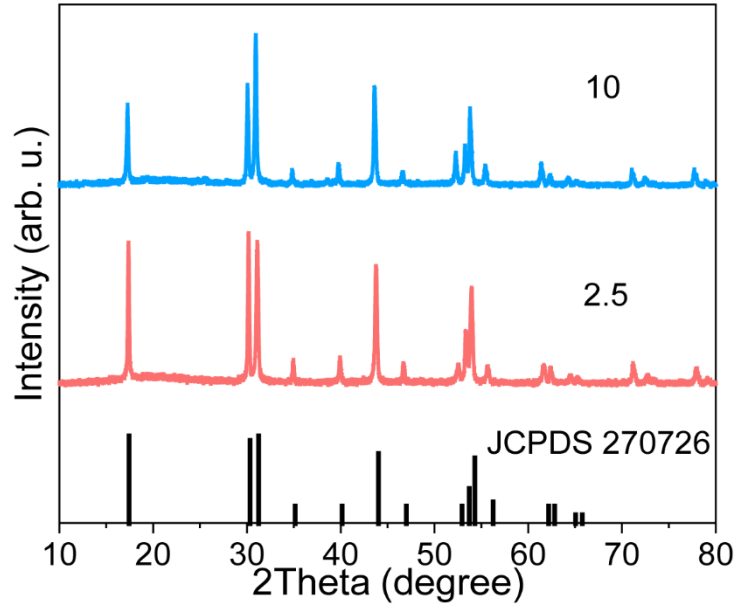

**Supplementary Fig. 23** XRD patterns of the NaYF<sub>4</sub>@NaLuF<sub>4</sub>: Gd/Tb NPs inert-core@active-shell NPs prepared with [Na]/[RE] of 2.5 and 10 in the shell layer. The same batch of NaYF<sub>4</sub> core NPs were divided into two equal parts, which then were employed for the growth of NaLuF<sub>4</sub>: Gd/Tb NPs active-shell layers with [Na]/[RE] of 2.5 and 10. Source data are provided as a Source Data file.

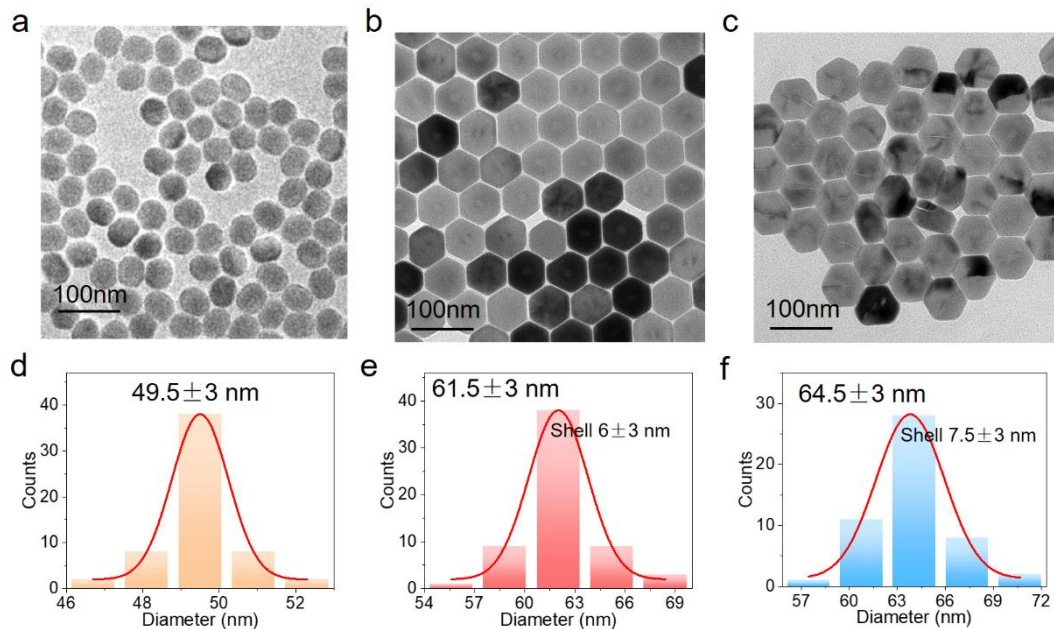

**Supplementary Fig. 24** TEM images of the NaYF<sub>4</sub> core-only (a), NaYF<sub>4</sub>@NaLuF<sub>4</sub>: Gd/Tb NPs inert-core@active-shell NPs prepared with [Na]/[RE] of 2.5 (b) and 10 (c) in the shell layer. (d-f) are their corresponding histogram size distributions of the top face. Source data are provided as a Source Data file.

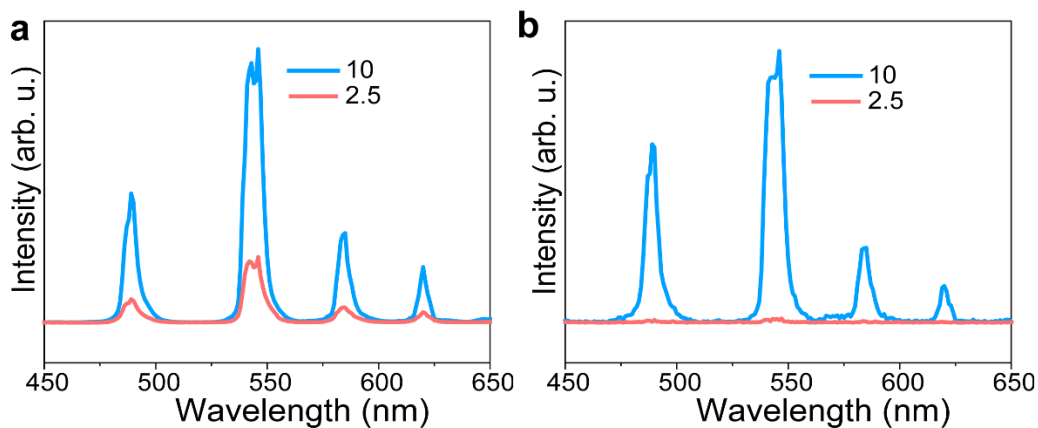

**Supplementary Fig. 25** XEOL (a) and XEA (b) of the NaYF<sub>4</sub>@NaLuF<sub>4</sub>: Gd/Tb NPs inert-core@active-shell NPs prepared with [Na]/[RE] of 2.5 and 10 in the shell layer. Source data are provided as a Source Data file.

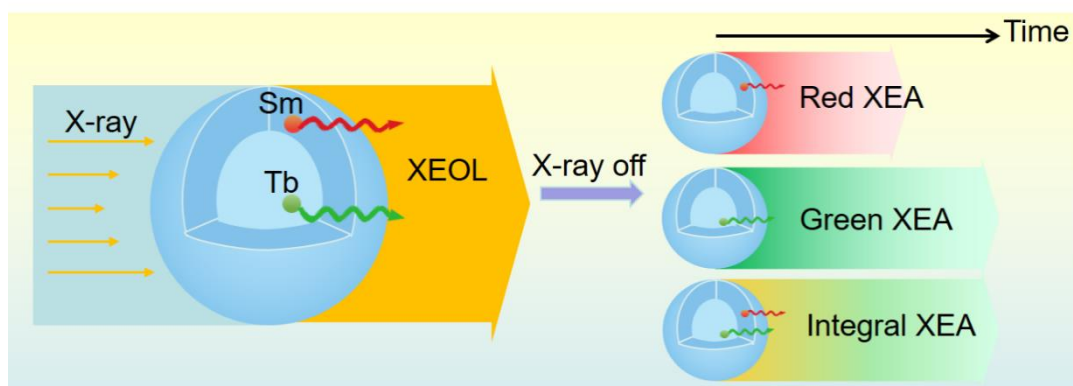

**Supplementary Fig. 26** Schematic illustration for the time-dependent color evolution process in the NaLuF<sub>4</sub>: Tb@NaLuF<sub>4</sub>: Sm core@shell NPs.



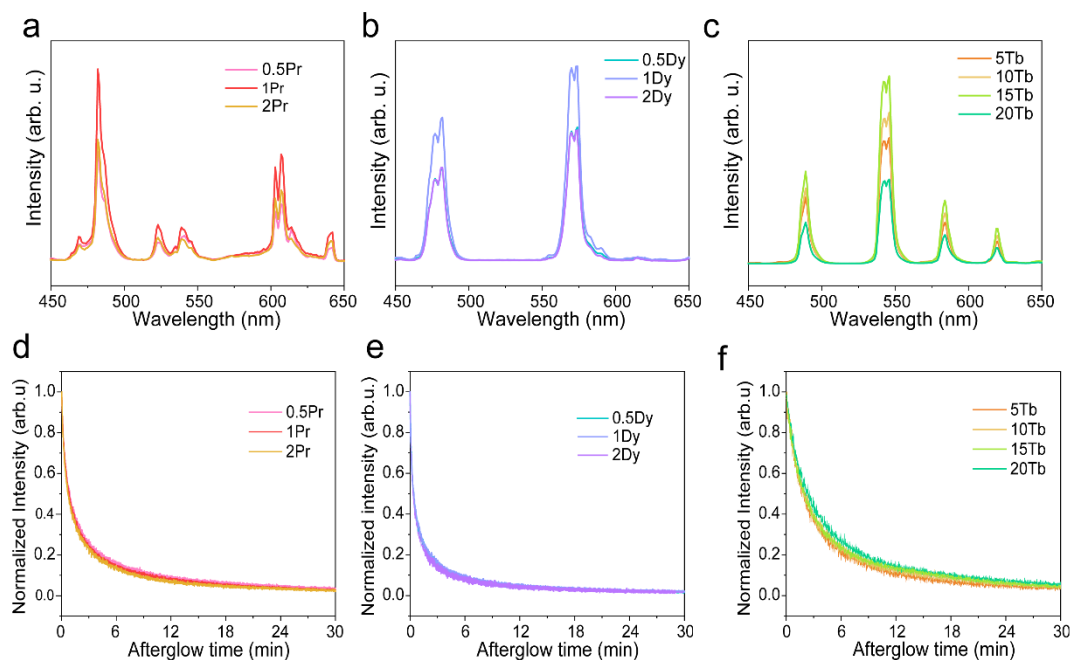

**Supplementary Fig. 27** XEOL spectra and XEA decay curves of different lanthanide activators, **a, d** Pr (0.5, 1, 2 mol%), **b, e** Dy (0.5, 1, 2 mol%), **c, f** Tb (5, 10, 15, 20 mol%). Source data are provided as a Source Data file.

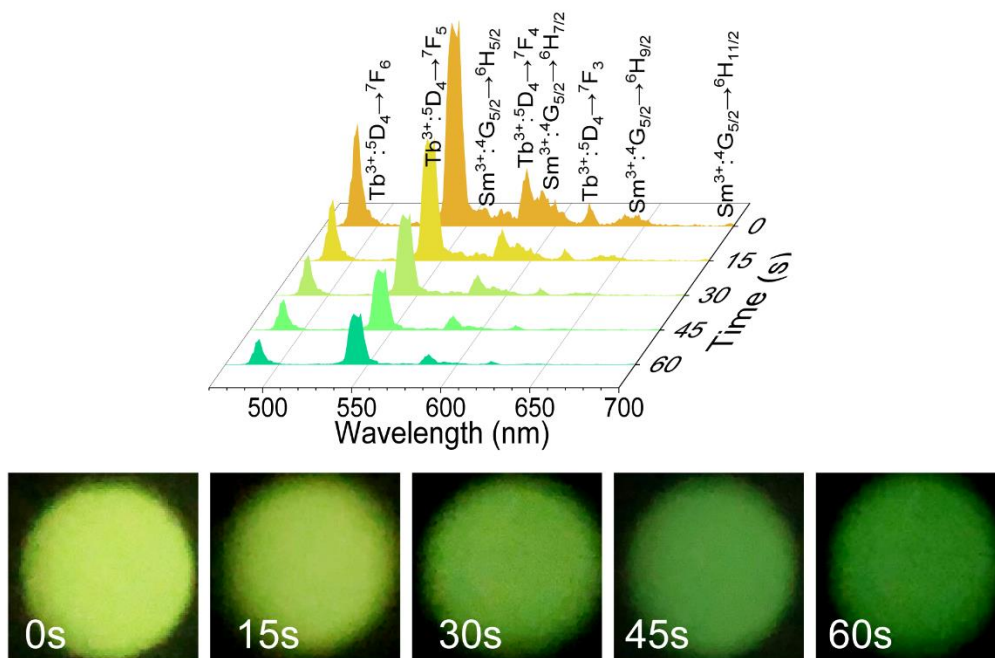

**Supplementary Fig. 28** XEA spectra and corresponding photographs with different delay times of the Tb@Sm NPs. Source data are provided as a Source Data file.



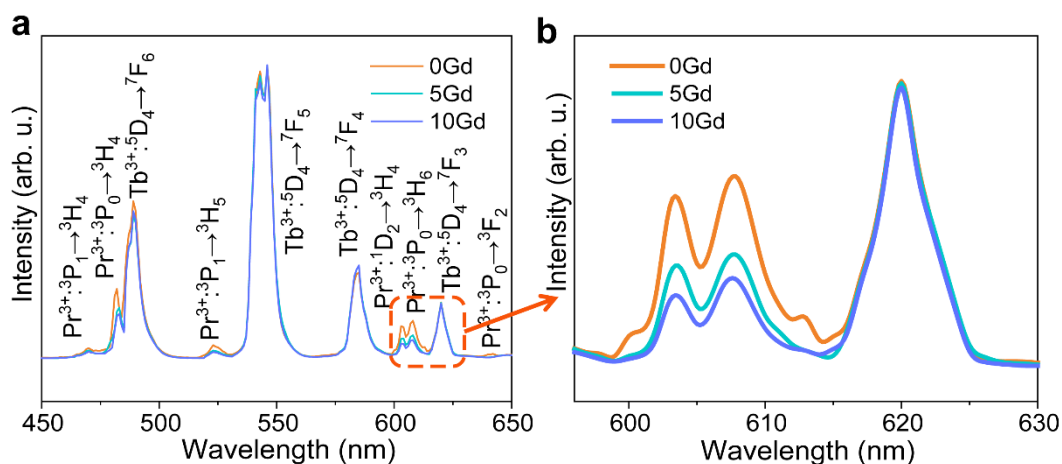

**Supplementary Fig. 29** **a** XEOL of the  $\text{NaLuF}_4$ : Gd/15Tb@ $\text{NaLuF}_4$ : 15Gd/0.5Pr NPs with different  $\text{Gd}^{3+}$  ions concentrations in the core layer. **b** Zoom-in XEOL between 580-630 nm. Source data are provided as a Source Data file.

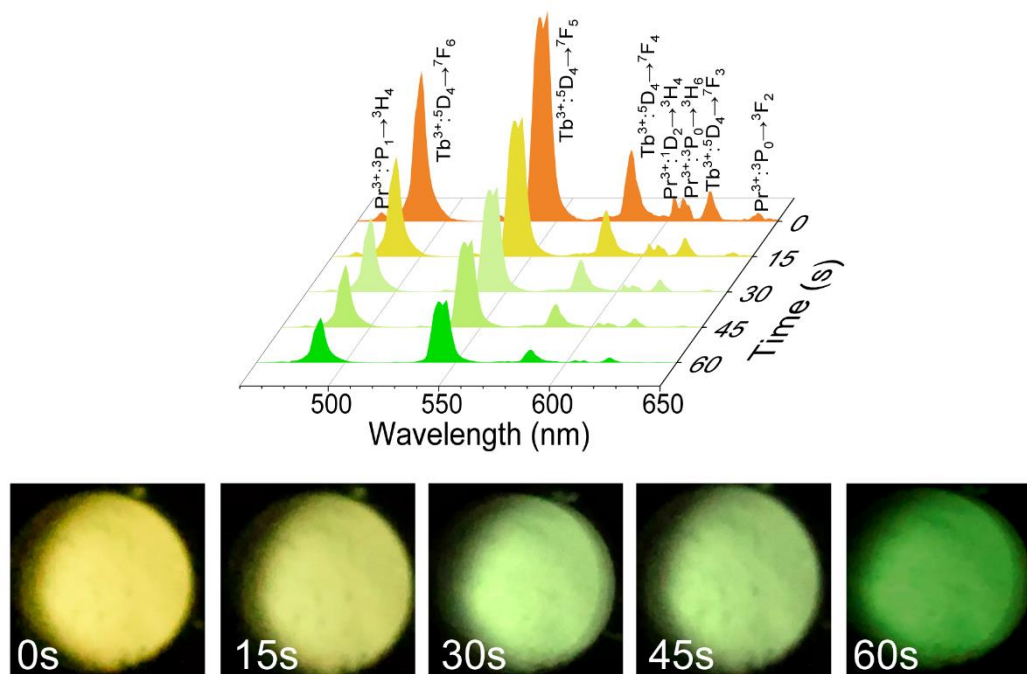

**Supplementary Fig. 30** XEA spectra and corresponding photographs with different delay times of the Tb@Pr NPs. Source data are provided as a Source Data file.

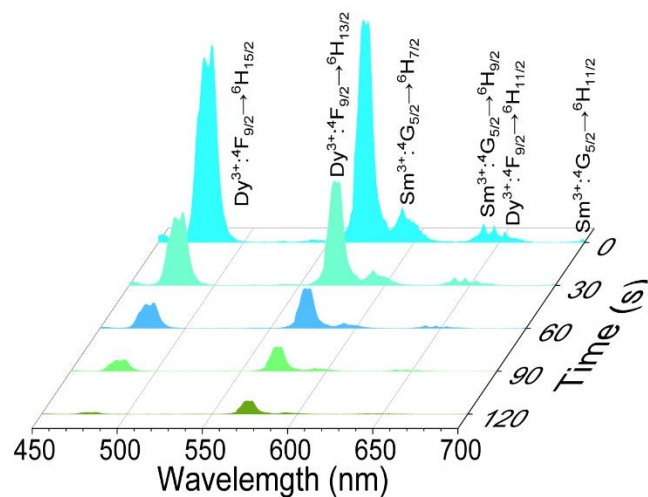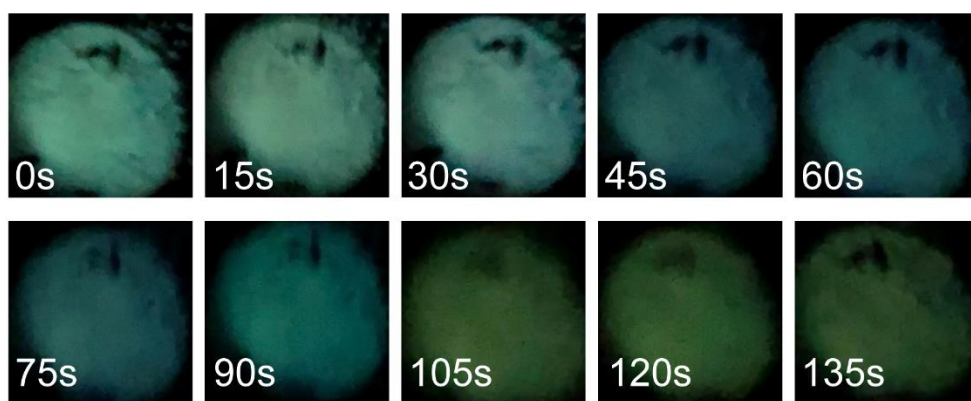

**Supplementary Fig. 31** XEA spectra and corresponding photographs with different delay times of the Sm@Dy NPs. Source data are provided as a Source Data file.

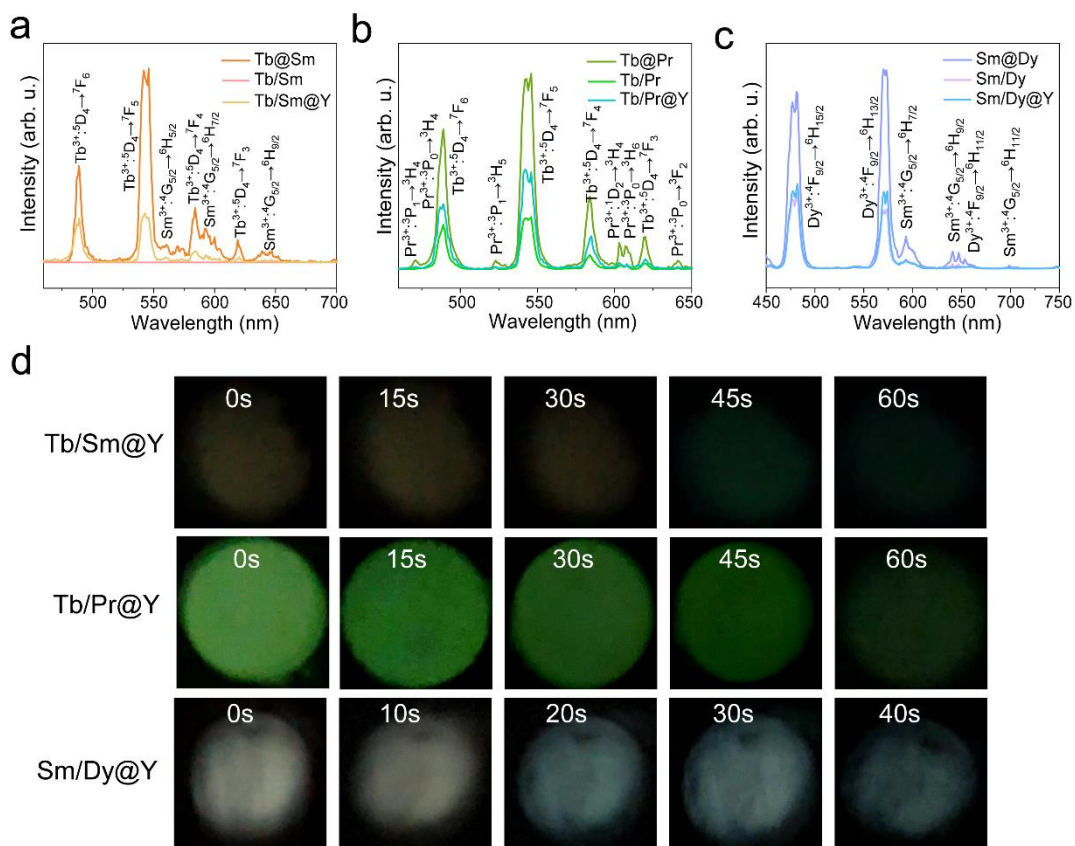

**Supplementary Fig. 32** **a** XEA spectra of the  $NaLuF_4:15Gd/15Tb/0.5Sm$  (Tb/Sm),  $NaLuF_4:15Gd/15Tb/0.5Sm@NaYF_4$  (Tb/Sm@Y) and  $NaLuF_4:15Gd/15Tb@NaLuF_4:10Gd/0.5Sm$  (Tb@Sm) NPs. **b** XEA spectra of the  $NaLuF_4:15Gd/15Tb/0.5Pr$  (Tb/Pr),  $NaLuF_4:15Gd/15Tb/0.5Pr@NaYF_4$  (Tb/Pr@Y) and  $NaLuF_4:15Tb@NaLuF_4:15Gd/0.5Pr$  (Tb@Pr). **c** XEA spectra of the  $NaLuF_4:15Gd/0.5Sm/0.5Dy$  (Sm/Dy),  $NaLuF_4:15Gd/0.5Sm/0.5Dy@NaYF_4$  (Sm/Dy@Y) and  $NaLuF_4:15Gd/0.5Sm@NaLuF_4:15Gd/0.5Dy$  (Sm@Dy) NPs. **d** XEA photographs of the above NPs with different delay times. Source data are provided as a Source Data file.

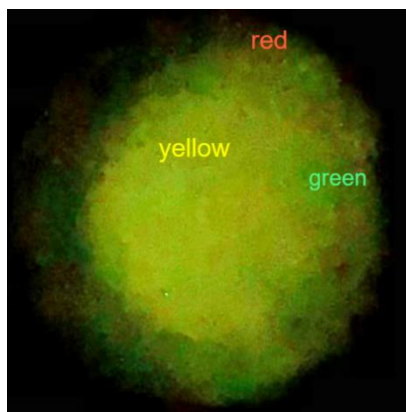

**Supplementary Fig. 33** XEA photograph of the  $\text{NaLuF}_4:15\text{Gd}/15\text{Tb}$  and  $\text{NaLuF}_4:15\text{Gd}/0.5\text{Sm}$  mixture.

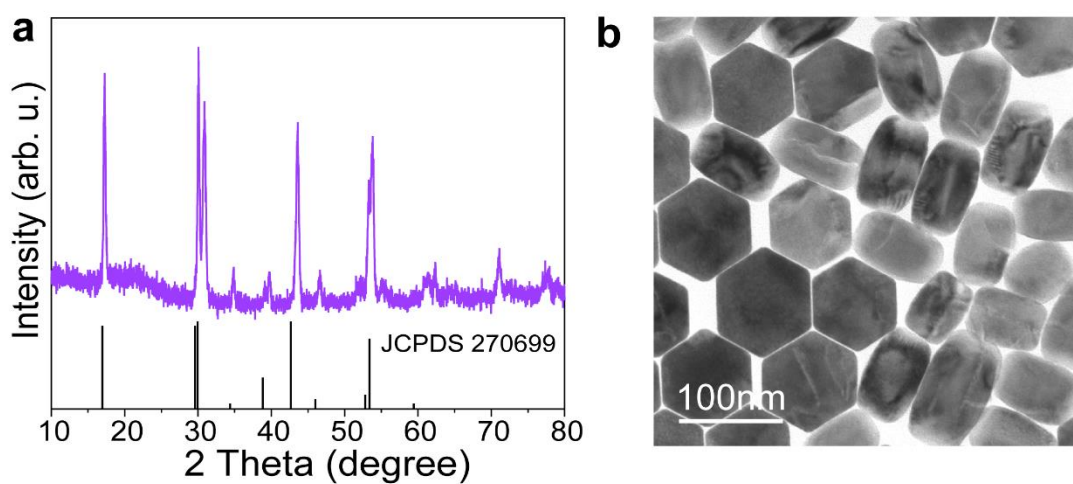

**Supplementary Fig. 34** XRD pattern (a) and TEM image (b) of the  $\text{NaLuF}_4:15\text{Gd}/15\text{Tb}@ \text{NaLuF}_4:15\text{Gd}/10\text{Ce}/0.5\text{Sm}@ \text{NaGdF}_4:49\text{Yb}/1\text{Tm}$  core@shell@shell NPs. Source data are provided as a Source Data file.

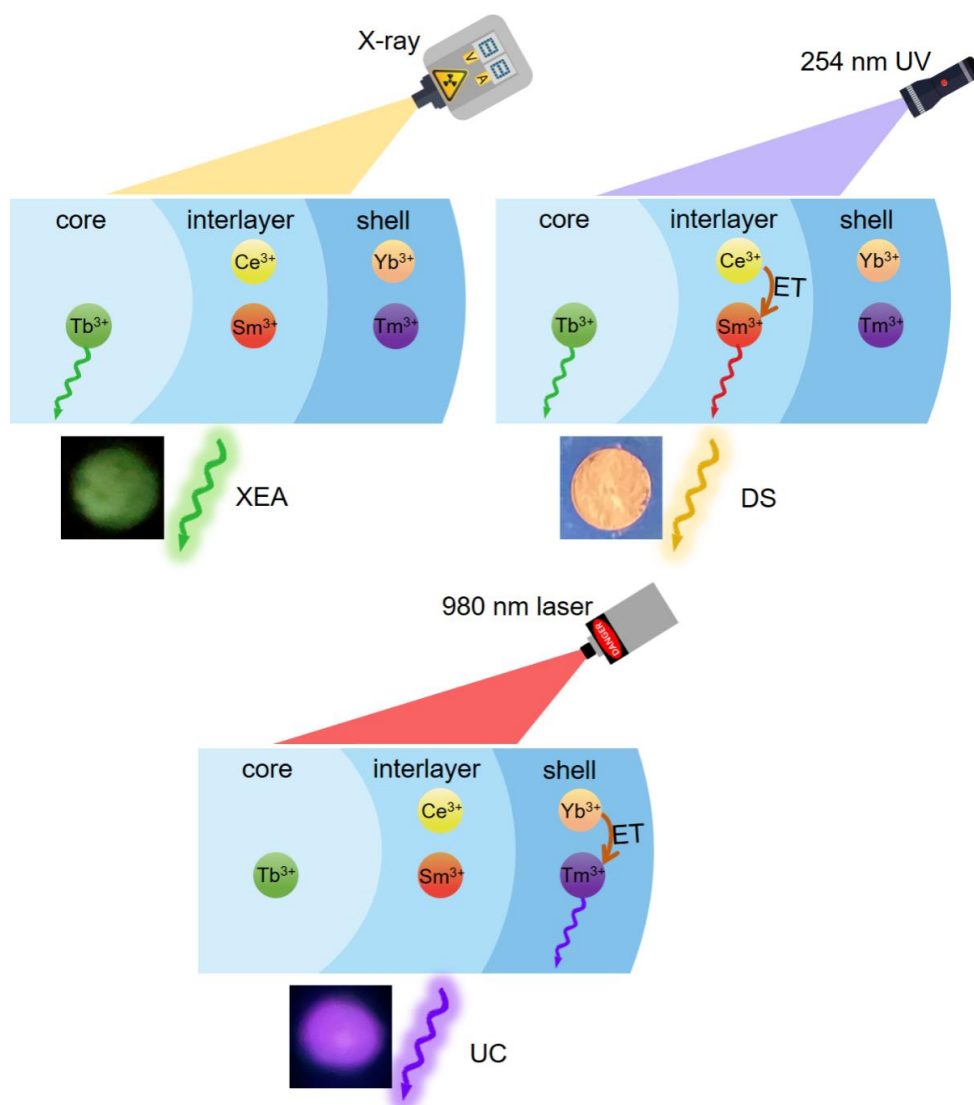

**Supplementary Fig. 35** Schematic illustration for the excitation-dependent multicolour variations based on the core@shell@shell NPs.

**Supplementary Discussion.** Upon X-ray irradiation, the  $\text{Tb}^{3+}$  ions exhibited strong green afterglow. The XEA of  $\text{Sm}^{3+}$  ions is inhibited by decreasing the  $[\text{Na}]/[\text{RE}]$  to 2.5 and codoping  $\text{Ce}^{3+}$  ions. The input 254 nm UV photons were absorbed by  $\text{Tb}^{3+}$  and  $\text{Ce}^{3+}$  ions via the 4f-5d transition, which leads to both red  $\text{Sm}^{3+}$  emission through  $\text{Ce}^{3+} \rightarrow \text{Sm}^{3+}$  or  $\text{Ce}^{3+} \rightarrow \text{Gd}^{3+} \rightarrow \text{Sm}^{3+}$  energy transfer and green  $\text{Tb}^{3+}$  emissions. Thus, under 254 nm UV illumination, the bright sulfur yellow color was observed. Under 980 nm laser excitation, the input photons are absorbed by  $\text{Yb}^{3+}$  sensitizers and then transferred to  $\text{Tm}^{3+}$  activators, resulting in the medium orchid UC.

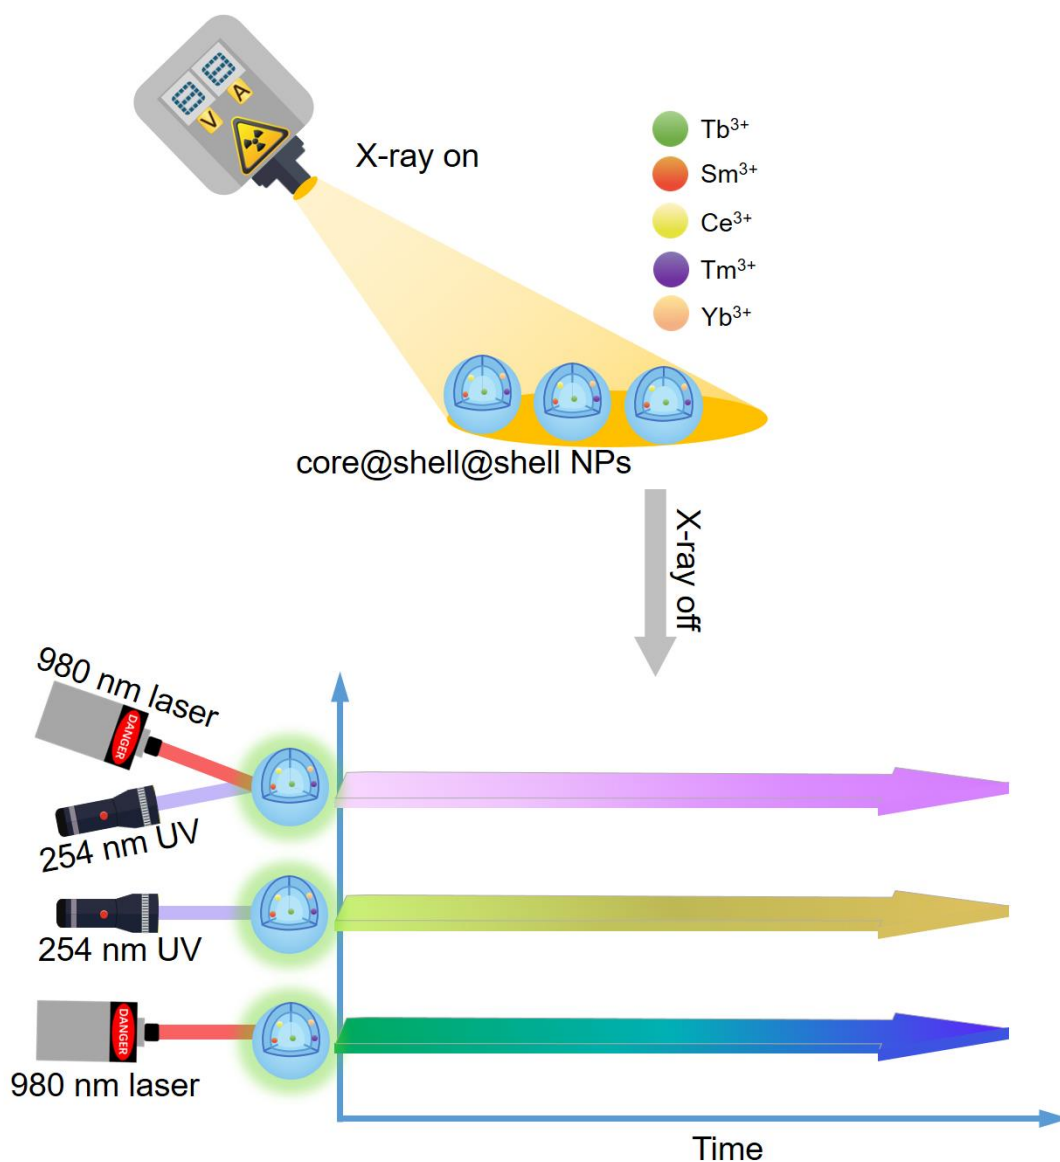

**Supplementary Fig. 36** Schematic illustration for the manipulation of time-dependent multicolour evolution based on the core@shell@shell NPs.

**Supplementary Discussion.** The bowknot gel prepared by the  $\text{NaLuF}_4$ :  $\text{Gd/Tb@NaLuF}_4$ :  $\text{Gd/Ce/Sm@NaGdF}_4$ :  $\text{Yb/Tm}$  core@shell@shell NPs was irradiated by X-rays for 5 min. The XEA brightness was tuned by changing the irradiation power. Then the bowknot was excited under different excitation conditions. The XEA intensity is decreased over time, while the UC and DS intensity are not changed. As a result, the integral color was changed over time under different excitations. The initial color was controlled by tuning the pumping power.



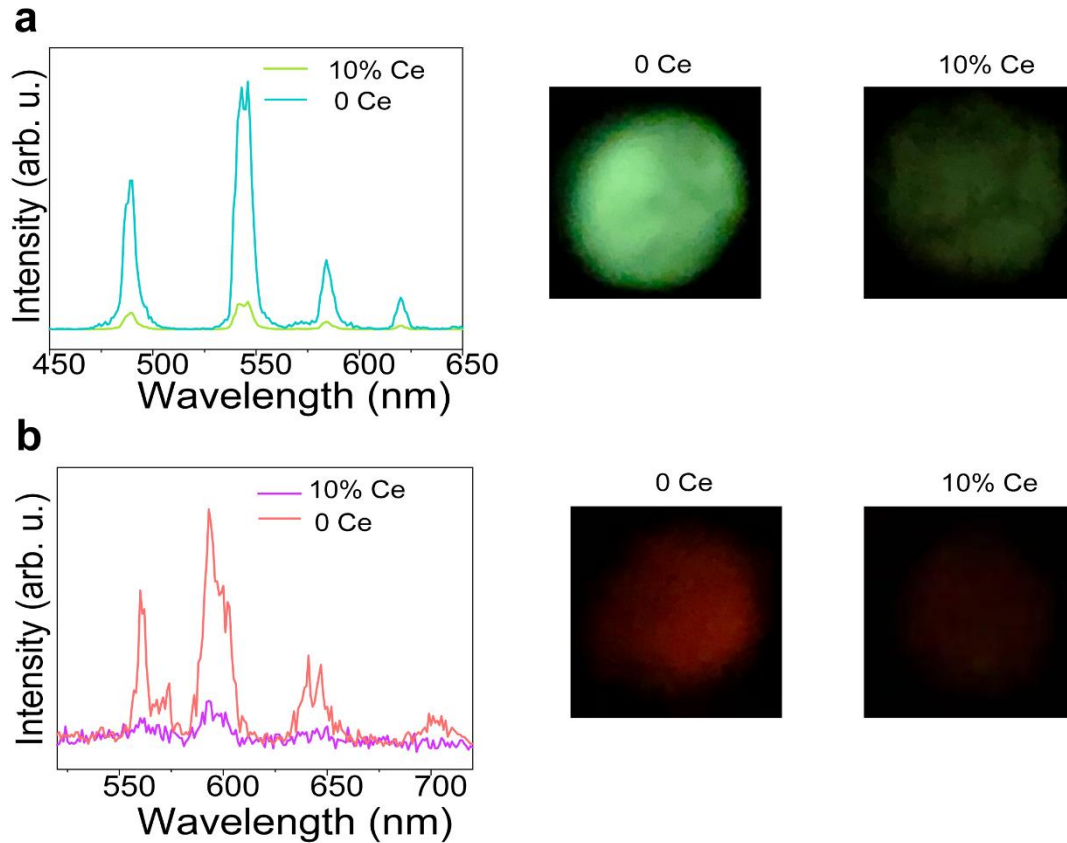

**Supplementary Fig. 37** XEA spectra of the NaLuF<sub>4</sub>: Gd/Tb (a) and NaLuF<sub>4</sub>: Gd/Sm NPs (b) doped with and without Ce<sup>3+</sup> ions (10 mol %) as well as their corresponding photographs. Source data are provided as a Source Data file.

**Supplementary Discussion.** The Ce<sup>3+</sup>, Gd<sup>3+</sup> and Sm<sup>3+</sup> ions compete to capture electrons from the traps. Compared with the parity forbidden transitions within the f-manifold of lanthanides, the 4f<sup>n</sup>-4f<sup>n-1</sup>5d<sup>1</sup> optical transitions are often characterized by high radiative emission probability because the f-d transition is electrical-dipole allowed. In our case, the Ce<sup>3+</sup> ion exhibits much larger absorption cross-section via 4f-5d transition than those of Gd<sup>3+</sup> and Sm<sup>3+</sup> ions via 4f-4f transitions, thus, most of the electrons deposited in the traps will be captured by Ce<sup>3+</sup> ions. Although the energy transfer processes from Ce<sup>3+</sup> to Gd<sup>3+</sup> and then to Sm<sup>3+</sup> has been widely used to produce DS emission, it is hard to avoid energy loss during the energy transfer from Ce<sup>3+</sup> to Gd<sup>3+</sup> and from Gd<sup>3+</sup> to Sm<sup>3+</sup>. As a result, the incorporated Ce<sup>3+</sup> ions will capture large number of electrons deposited in the traps, many of which are lost during the energy transfer processes.

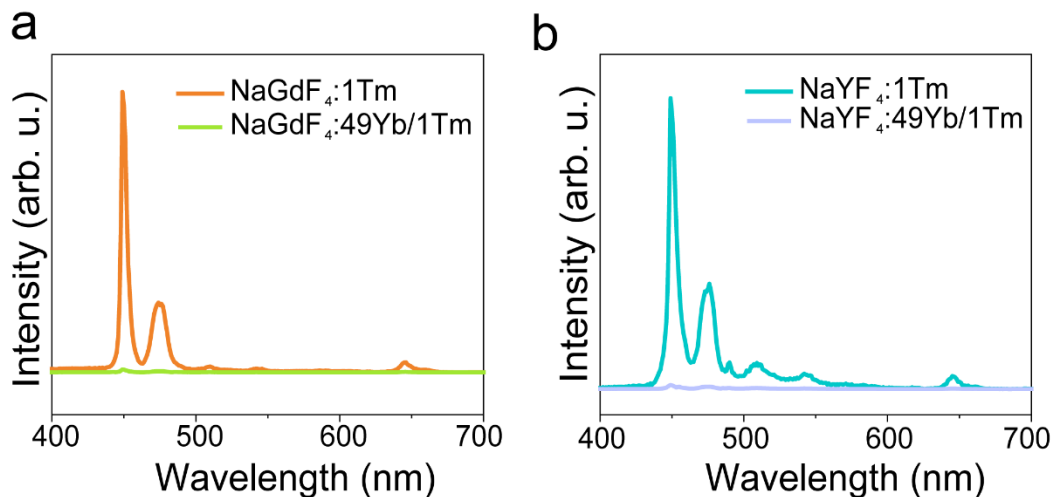

**Supplementary Fig. 38** Compared XEA spectra of the NaGdF<sub>4</sub>: 1Tm and NaGdF<sub>4</sub>: 49Yb/1Tm (a), NaYF<sub>4</sub>: 1Tm and NaYF<sub>4</sub>: 49Yb/1Tm NPs (b). Source data are provided as a Source Data file.

**Supplementary Discussion.** The high concentration Yb<sup>3+</sup> captures many electrons from the traps, and the efficiency of energy transfer from Yb<sup>3+</sup> to Tm<sup>3+</sup> is low for XEA process. Thus, the electron population in the Tm<sup>3+</sup> is greatly reduced after the incorporation of Yb<sup>3+</sup> ions.

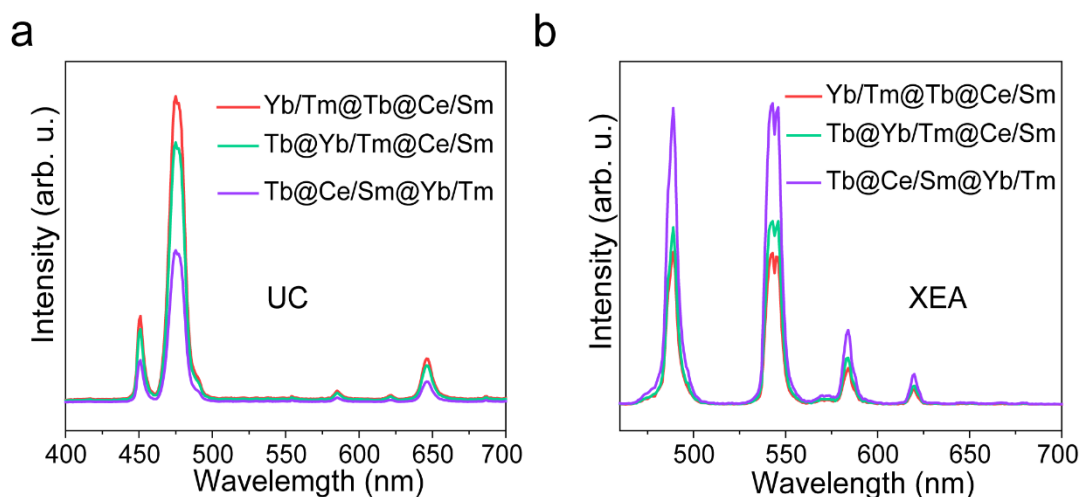

**Supplementary Fig. 39** UC (a) and XEA (b) spectra of the Yb/Tm@Tb@Ce/Sm, Tb@Yb/Tm@Ce/Sm and Tb@Ce/Sm@Yb/Tm NPs. Source data are provided as a Source Data file.



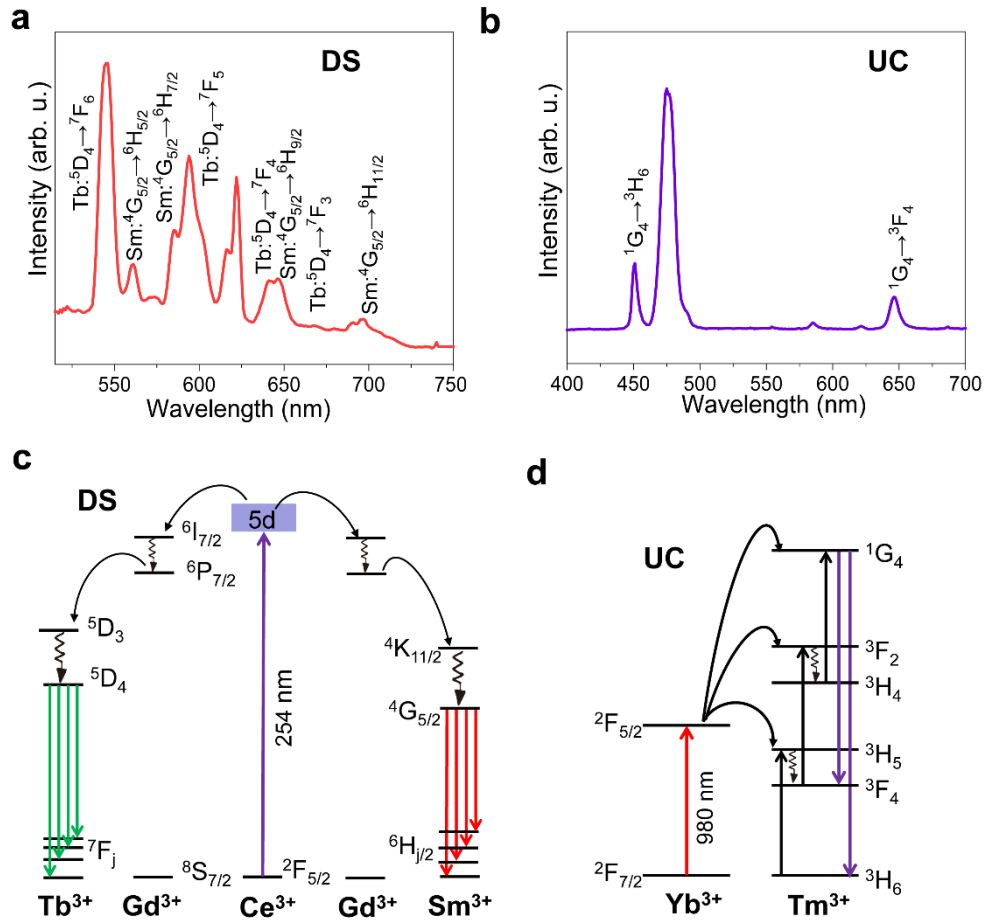

**Supplementary Fig. 40** DS (a) and UC (b) emission spectra of the Tb@Ce/Sm@Yb/Tm core@shell@shell NPs. Proposed energy transfer processes of the DS (c) and UC (d). Source data are provided as a Source Data file.

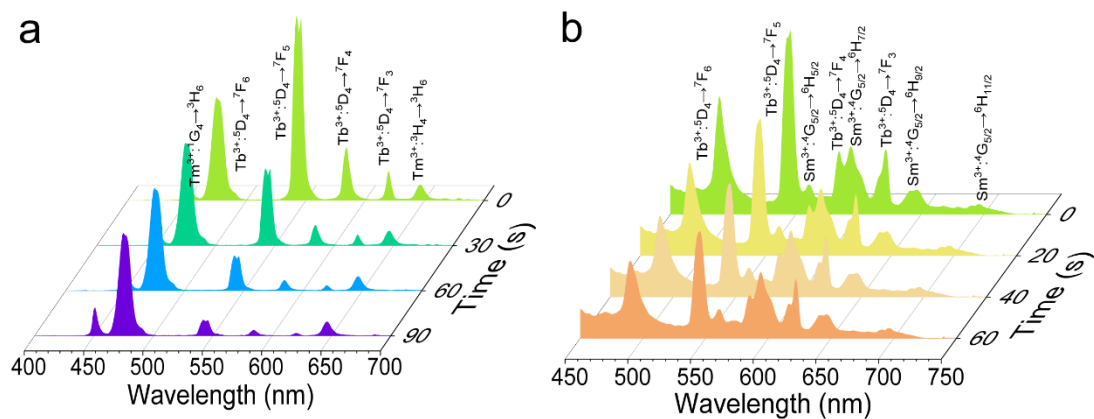

**Supplementary Fig. 41** Time-dependent UC (a) and DS (b) spectra of the pre-X-ray-irradiated bowknot gel. Source data are provided as a Source Data file.

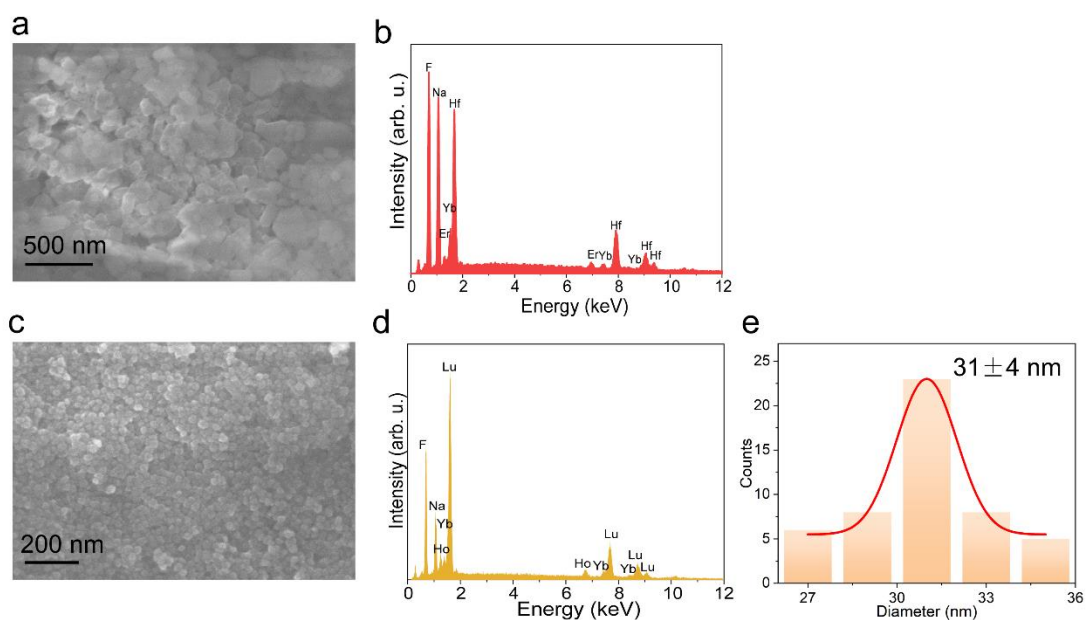

**Supplementary Fig. 42** SEM image (a) and EDS spectrum (b) of the  $\text{Na}_3\text{HfF}_7:\text{Yb}/\text{Er}$ . SEM image (c), EDS spectrum (d) and size distribution (e) of the  $\text{NaLuF}_4:\text{Yb}/\text{Ho}$ . Source data are provided as a Source Data file.
